# Supplementary material for: Exceptionally cold water days in the southern Taiwan Strait: their predictability and relation to La Niña
Source: Copernicus journal article supplement (doi:10.5194/nhess-18-1999-2018), 2018-08-01
Supplement: Supplementary file 1 [file nhess-18-1999-2018-supplement.pdf]

Supplement of Nat. Hazards Earth Syst. Sci., 18, 1999–2010, 2018  
<https://doi.org/10.5194/nhess-18-1999-2018-supplement>  
© Author(s) 2018. This work is distributed under  
the Creative Commons Attribution 4.0 License.

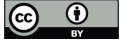

*Supplement of*

## **Exceptionally cold water days in the southern Taiwan Strait: their predictability and relation to La Niña**

**Yu-Hsin Cheng and Ming-Huei Chang**

*Correspondence to:* Ming-Huei Chang ([minghueichang@ntu.edu.tw](mailto:minghueichang@ntu.edu.tw))

The copyright of individual parts of the supplement might differ from the CC BY 4.0 License.

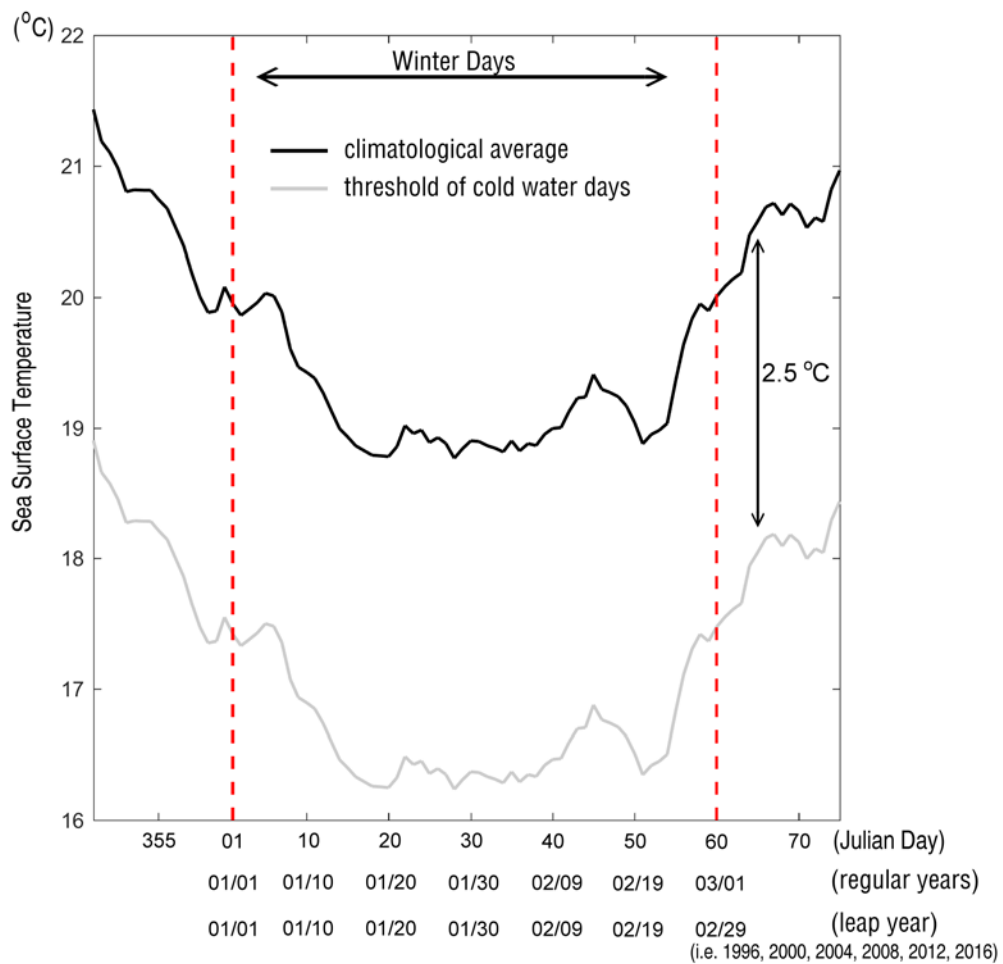

**Figure S1:** time series of climatological SST (black line) across the southern TS (the white dash rectangle in Figure 1) and critical temperature of cold water days (gray line). Red dash lines reveal the period of winter days.

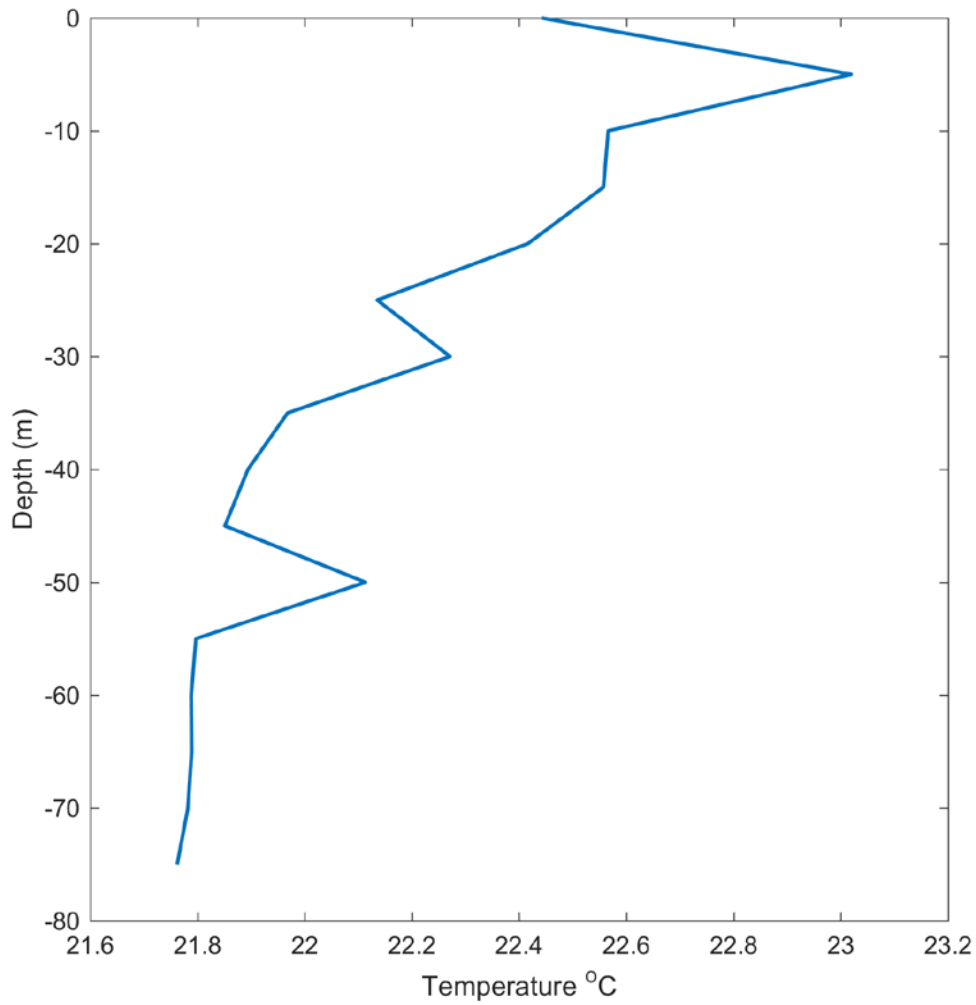

**Figure S2:** A climatological temperature profile during winter (December to February 1985–2017) near the Penghu (23.75° N, 119.75° E), provided by the Ocean Data Bank of Taiwan.

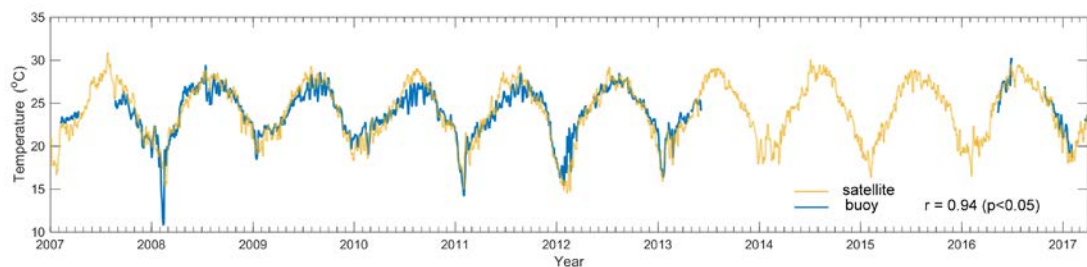

**Figure S3:** Time series of SST observed by satellite (yellow line) and buoy (blue line). Please note that buoy SST can be used after January 2007 and therefore the figure shows the correlation between satellite SST and buoy SST after January 2007.
